# Supplementary material
Source: PubMed Central journal article supplement (PMC3103189)
Supplement: jm1015389_si_001.pdf [file jm1015389_si_001.pdf]

# Supporting Information

## 8-Azatetracyclines: Synthesis and Evaluation of a Novel Class of Tetracycline Antibacterial Agents

*Roger B. Clark*<sup>\*</sup>, *Minsheng He*, *Corey Fyfe*, *Denene Lofland*, *William J. O'Brien*, *Louis Plamondon*,  
*Joyce A. Sutcliffe*, and *Xiao-Yi Xiao*.

Tetraphase Pharmaceuticals, Inc., 480 Arsenal Street, Watertown, MA 02472.

### **Table of Contents**

|                                                                     |    |
|---------------------------------------------------------------------|----|
| A) Full panel MIC data for all compounds                            | S2 |
| B) MIC Data for <i>S. aureus</i> MIC <sub>90</sub> calculations     | S4 |
| C) MIC Data for <i>S. pneumoniae</i> MIC <sub>90</sub> calculations | S5 |
| D) MIC Data for <i>H. influenzae</i> MIC <sub>90</sub> calculations | S5 |
| E) MIC data for <i>E. coli</i> MIC <sub>90</sub> calculations       | S6 |

A) Full panel MIC data for all compounds.

**Table 9.** Gram-positive MIC data for all compounds.

| Cmpd       | MIC ( $\mu\text{g/mL}$ ) |                             |                                      |                                      |                    |                                      |                    |                                      |
|------------|--------------------------|-----------------------------|--------------------------------------|--------------------------------------|--------------------|--------------------------------------|--------------------|--------------------------------------|
|            | SA101 <sup>a</sup>       | SA100 <sup>a</sup><br>Smith | SA161 <sup>a</sup><br><i>tet</i> (M) | SA158 <sup>a</sup><br><i>tet</i> (K) | EF103 <sup>b</sup> | EF159 <sup>b</sup><br><i>tet</i> (M) | SP106 <sup>c</sup> | SP160 <sup>c</sup><br><i>tet</i> (M) |
| <b>20a</b> | 0.5                      | 1                           | 32                                   | 16                                   | 16                 | >32                                  | 0.25               | 32                                   |
| <b>20b</b> | 1                        | 1                           | 32                                   | 32                                   | 32                 | >32                                  | 1                  | 32                                   |
| <b>20d</b> | 0.5                      | 1                           | 32                                   | 0.5                                  | >32                | >32                                  | 0.25               | >32                                  |
| <b>20e</b> | 0.063                    | 0.063                       | 32                                   | 1                                    | 4                  | >32                                  | 0.031              | 4                                    |
| <b>20f</b> | 0.031                    | 0.25                        | 32                                   | 1                                    | 1                  | 32                                   | 0.063              | 8                                    |
| <b>20g</b> | 0.125                    | 0.125                       | 8                                    | 4                                    | 8                  | >32                                  | 0.063              | 16                                   |
| <b>20i</b> | 0.031                    | 0.063                       | 8                                    | 8                                    | 4                  | 32                                   | 0.016              | 8                                    |
| <b>20j</b> | 0.063                    | 0.016                       | 4                                    | 8                                    | 1                  | 32                                   | 0.016              | 4                                    |
| <b>20k</b> | 0.063                    | 0.063                       | 2                                    | 8                                    | 0.5                | 16                                   | 0.063              | 2                                    |
| <b>21a</b> | 2                        | 2                           | 32                                   | 32                                   | 8                  | >32                                  | 1                  | 16                                   |
| <b>21b</b> | 4                        | 4                           | 16                                   | 16                                   | 8                  | 32                                   | 2                  | 8                                    |
| <b>21c</b> | 16                       | 16                          | 32                                   | 8                                    | 8                  | 16                                   | 4                  | 4                                    |
| <b>24a</b> | 0.031                    | 0.031                       | 1                                    | 0.5                                  | 0.063              | 4                                    | 0.031              | 4                                    |
| <b>24b</b> | 0.016                    | 0.016                       | 1                                    | 2                                    | 0.125              | 8                                    | 0.016              | 4                                    |
| <b>24c</b> | 0.031                    | 0.063                       | 1                                    | 0.5                                  | 0.5                | 2                                    | 0.25               | 8                                    |
| <b>24d</b> | 1                        | 1                           | 4                                    | 2                                    | 2                  | 2                                    | 2                  | 16                                   |
| <b>24e</b> | 0.25                     | 0.5                         | 1                                    | 0.5                                  | 0.5                | 1                                    | 1                  | 8                                    |
| <b>24f</b> | 0.5                      | 0.25                        | 2                                    | 0.25                                 | 2                  | 2                                    | 8                  | 32                                   |
| <b>24g</b> | 0.016                    | 0.031                       | 4                                    | 1                                    | 0.25               | 8                                    | 0.063              | 4                                    |
| <b>24h</b> | 0.25                     | 0.5                         | 2                                    | 0.25                                 | 2                  | 4                                    | 0.031              | 4                                    |
| <b>24i</b> | 2                        | 2                           | 8                                    | 2                                    | 4                  | 32                                   | 1                  | 4                                    |
| <b>24j</b> | 1                        | 1                           | 2                                    | 0.5                                  | 0.5                | 2                                    | 0.5                | 1                                    |
| <b>24k</b> | 1                        | 2                           | 4                                    | 1                                    | 2                  | 8                                    | 0.5                | 2                                    |
| <b>24l</b> | 0.25                     | 0.5                         | 2                                    | 0.125                                | 0.25               | 2                                    | 0.016              | 0.125                                |
| <b>24m</b> | 0.25                     | 0.5                         | 2                                    | 0.125                                | 0.5                | 2                                    | 0.031              | 0.25                                 |
| <b>24n</b> | 0.25                     | 0.25                        | 2                                    | 0.25                                 | 0.5                | 4                                    | 4                  | 4                                    |
| <b>24o</b> | >32                      | >32                         | >32                                  | >32                                  | >32                | >32                                  | 8                  | >32                                  |
| <b>26a</b> | 0.5                      | 1                           | 2                                    | 1                                    | 1                  | 2                                    | 1                  | 2                                    |
| <b>26b</b> | 1                        | 1                           | 4                                    | 4                                    | 4                  | 4                                    | 1                  | 4                                    |
| <b>26c</b> | 2                        | 2                           | 8                                    | 16                                   | 8                  | 16                                   | 0.5                | 8                                    |
| <b>26d</b> | 4                        | 4                           | 32                                   | 32                                   | 16                 | >32                                  | 1                  | 16                                   |
| <b>26e</b> | 1                        | 1                           | 2                                    | 1                                    | 1                  | 1                                    | 8                  | 8                                    |
| <b>26f</b> | 4                        | 4                           | 8                                    | 16                                   | 4                  | 4                                    | 2                  | 8                                    |
| <b>2</b>   | 0.5                      | 1                           | >32                                  | 32                                   | 16                 | >32                                  | 0.25               | 32                                   |
| <b>4</b>   | 0.063                    | 0.125                       | 16                                   | 0.25                                 | 1                  | 16                                   | <0.016             | 8                                    |
| <b>5</b>   | 0.063                    | 0.063                       | 0.125                                | 0.063                                | 0.031              | 0.063                                | 0.016              | 0.016                                |
| <b>6</b>   | 0.5                      | 0.5                         | 2                                    | 0.25                                 | 0.25               | 0.5                                  | 0.031              | 0.125                                |

<sup>a</sup> *S. aureus*. <sup>b</sup> *E. faecalis*. <sup>c</sup> *S. pneumoniae*.

**Table 10.** Gram-negative MIC data for all compounds.

| Cmpd       | Organism, MIC ( $\mu\text{g/mL}$ ) |                                     |                    |                    |                    |                    |                                     |
|------------|------------------------------------|-------------------------------------|--------------------|--------------------|--------------------|--------------------|-------------------------------------|
|            | EC107 <sup>a</sup>                 | EC155 <sup>a</sup><br><i>tet(A)</i> | AB110 <sup>b</sup> | PA111 <sup>c</sup> | EC108 <sup>d</sup> | KP109 <sup>e</sup> | KP153 <sup>e</sup><br><i>tet(A)</i> |
| <b>20a</b> | 0.5                                | >32                                 | 2                  | 8                  | 1                  | 1                  | >32                                 |
| <b>20b</b> | 2                                  | >32                                 | 32                 | >32                | 8                  | 4                  | >32                                 |
| <b>20d</b> | 1                                  | >32                                 | 1                  | 16                 | 1                  | 1                  | >32                                 |
| <b>20e</b> | 0.5                                | >32                                 | 0.125              | >32                | 2                  | 2                  | >32                                 |
| <b>20f</b> | 0.125                              | >32                                 | 0.5                | 8                  | 0.5                | 0.25               | >32                                 |
| <b>20g</b> | 0.25                               | >32                                 | 0.5                | >32                | 1                  | 1                  | >32                                 |
| <b>20i</b> | 0.25                               | >32                                 | 0.25               | 8                  | 0.5                | 0.5                | >32                                 |
| <b>20j</b> | 0.25                               | >32                                 | 0.5                | 8                  | 1                  | 0.5                | >32                                 |
| <b>20k</b> | 0.25                               | >32                                 | 0.5                | 4                  | 0.5                | 1                  | >32                                 |
| <b>21a</b> | 4                                  | >32                                 | 8                  | >32                | 8                  | 8                  | >32                                 |
| <b>21b</b> | 8                                  | >32                                 | 16                 | >32                | 16                 | 16                 | >32                                 |
| <b>21c</b> | 32                                 | >32                                 | >32                | >32                | 32                 | >32                | >32                                 |
| <b>24a</b> | 0.5                                | 16                                  | 0.031              | 16                 | 4                  | 2                  | 32                                  |
| <b>24b</b> | 0.125                              | 32                                  | 0.031              | 8                  | 0.5                | 0.5                | 32                                  |
| <b>24c</b> | 4                                  | 16                                  | N/A                | 32                 | 16                 | 8                  | 32                                  |
| <b>24d</b> | 32                                 | >32                                 | 1                  | >32                | 32                 | 32                 | >32                                 |
| <b>24e</b> | 16                                 | >32                                 | 2                  | >32                | >32                | >32                | >32                                 |
| <b>24f</b> | >32                                | >32                                 | 4                  | >32                | >32                | >32                | >32                                 |
| <b>24g</b> | 1                                  | 32                                  | 0.063              | 32                 | 4                  | 4                  | >32                                 |
| <b>24h</b> | 8                                  | >32                                 | 0.25               | >32                | 32                 | 16                 | >32                                 |
| <b>24i</b> | 8                                  | >32                                 | >32                | >32                | 16                 | 16                 | >32                                 |
| <b>24j</b> | 1                                  | 8                                   | 4                  | 32                 | 2                  | 2                  | 8                                   |
| <b>24k</b> | 4                                  | 32                                  | 32                 | 32                 | 8                  | 8                  | 32                                  |
| <b>24l</b> | 0.5                                | 8                                   | 2                  | 32                 | 2                  | 2                  | 8                                   |
| <b>24m</b> | 2                                  | 8                                   | 2                  | 32                 | 4                  | 4                  | 8                                   |
| <b>24n</b> | 2                                  | 16                                  | 0.125              | 16                 | 8                  | 8                  | 32                                  |
| <b>24o</b> | >32                                | >32                                 | >32                | >32                | >32                | >32                | >32                                 |
| <b>26a</b> | 16                                 | >32                                 | 2                  | >32                | >32                | 16                 | >32                                 |
| <b>26b</b> | 16                                 | 32                                  | 4                  | >32                | 32                 | 32                 | >32                                 |
| <b>26c</b> | 8                                  | >32                                 | 4                  | >32                | 32                 | 8                  | >32                                 |
| <b>26d</b> | 8                                  | >32                                 | 4                  | 32                 | 8                  | 8                  | >32                                 |
| <b>26e</b> | >32                                | >32                                 | 16                 | >32                | >32                | >32                | >32                                 |
| <b>26f</b> | 16                                 | >32                                 | 8                  | >32                | >32                | 32                 | >32                                 |
| <b>2</b>   | 2                                  | >32                                 | 1                  | 16                 | 2                  | 4                  | >32                                 |
| <b>4</b>   | 0.5                                | 8                                   | 0.063              | 16                 | 2                  | 1                  | 8                                   |
| <b>5</b>   | 0.125                              | 0.5                                 | 0.25               | 8                  | 0.25               | 0.125              | 1                                   |
| <b>6</b>   | 2                                  | 16                                  | 1                  | >32                | 4                  | 2                  | 16                                  |

<sup>a</sup> *E. coli*. <sup>b</sup> *A. baumannii*. <sup>c</sup> *P. aeruginosa*. <sup>d</sup> *E. cloacae*. <sup>e</sup> *K. pneumoniae*.

B) MIC Data for *S. aureus* MIC<sub>90</sub> calculations.

**Table 11.** Individual MIC data for *S. aureus* MIC<sub>90</sub> calculations.<sup>a</sup>

| <i>S. aureus</i><br>strain | Compound, MIC (µg/mL) |          |            |            |
|----------------------------|-----------------------|----------|------------|------------|
|                            | <b>2</b>              | <b>5</b> | <b>20f</b> | <b>24I</b> |
| 102                        | 32                    | 0.25     | 4          | 1          |
| 113                        | 0.063                 | 0.031    | ≤0.016     | 0.125      |
| 114                        | 0.063                 | 0.031    | ≤0.016     | 0.125      |
| 115                        | 0.125                 | 0.031    | ≤0.016     | 0.125      |
| 116                        | 0.125                 | 0.031    | ≤0.016     | 0.125      |
| 117                        | 0.063                 | ≤0.016   | ≤0.016     | 0.125      |
| 118                        | 0.125                 | 0.063    | ≤0.016     | 0.125      |
| 119                        | 0.25                  | 0.063    | ≤0.016     | 0.125      |
| 120                        | 0.125                 | 0.063    | ≤0.016     | 0.125      |
| 121                        | 0.125                 | 0.031    | ≤0.016     | 0.125      |
| 122                        | 0.25                  | 0.063    | ≤0.016     | 0.25       |
| 123                        | 0.125                 | 0.063    | ≤0.016     | 0.125      |
| 124                        | 0.125                 | 0.063    | ≤0.016     | 0.125      |
| 125                        | 0.125                 | 0.063    | ≤0.016     | 0.125      |
| 126                        | 0.125                 | 0.031    | ≤0.016     | 0.125      |
| 127                        | 0.125                 | 0.031    | ≤0.016     | 0.25       |
| 128                        | 0.125                 | 0.063    | ≤0.016     | 0.25       |
| 129                        | 0.125                 | 0.031    | ≤0.016     | 0.063      |
| 130                        | 0.125                 | 0.063    | ≤0.016     | 0.25       |
| 131                        | 32                    | 0.125    | 1          | 0.5        |
| 132                        | 0.125                 | 0.063    | ≤0.016     | 0.125      |
| 158                        | 32                    | 0.063    | 2          | 0.125      |
| 160                        | >32                   | 0.125    | 16         | 2          |
| 176                        | >64                   | 1        | 8          | 2          |
| 177                        | >64                   | 0.25     | 32         | 1          |
| 178                        | >64                   | 0.25     | 32         | 1          |
| 179                        | >64                   | 0.25     | 32         | 1          |
| 180                        | 64                    | 0.25     | 2          | 0.25       |
| 181                        | >64                   | 1        | 8          | 2          |
| 183                        | 64                    | 1        | 8          | 2          |
| 184                        | >64                   | 1        | 16         | 4          |

<sup>a</sup> *S. aureus* strains were collected from various geographical sources.

C) MIC Data for *S. pneumoniae* MIC<sub>90</sub> calculations.

**Table 12.** Individual MIC data for *S. pneumoniae* MIC<sub>90</sub> calculations.<sup>a</sup>

| <i>S. pneumoniae</i><br>strain | Compound, MIC (µg/mL) |          |            |            |
|--------------------------------|-----------------------|----------|------------|------------|
|                                | <b>2</b>              | <b>5</b> | <b>20f</b> | <b>24I</b> |
| 106                            | 0.125                 | ≤0.016   | ≤0.016     | ≤0.016     |
| 160                            | 32                    | ≤0.016   | 8          | 0.063      |
| 287                            | >32                   | ≤0.016   | 4          | 0.063      |
| 289                            | >32                   | ≤0.016   | 1          | 0.063      |
| 290                            | 32                    | ≤0.016   | 4          | 0.031      |
| 291                            | >32                   | ≤0.016   | 4          | 0.063      |
| 292                            | >32                   | ≤0.016   | 4          | 0.063      |
| 294                            | 0.063                 | ≤0.016   | ≤0.016     | ≤0.016     |
| 295                            | 16                    | ≤0.016   | 2          | ≤0.016     |
| 296                            | >32                   | ≤0.016   | 8          | 0.063      |
| 297                            | 32                    | ≤0.016   | 4          | 0.031      |
| 298                            | 0.063                 | ≤0.016   | ≤0.016     | ≤0.016     |
| 299                            | 0.125                 | ≤0.016   | ≤0.016     | ≤0.016     |
| 300                            | 0.125                 | ≤0.016   | ≤0.016     | ≤0.016     |
| 301                            | 0.125                 | ≤0.016   | ≤0.016     | ≤0.016     |
| 302                            | 0.125                 | ≤0.016   | ≤0.016     | ≤0.016     |
| 305                            | 16                    | ≤0.016   | 2          | ≤0.016     |
| 307                            | 32                    | ≤0.016   | 2          | ≤0.016     |
| 465                            | 32                    | ≤0.016   | 4          | 0.031      |

<sup>a</sup> *S. pneumoniae* isolates were obtained from Eurofins-Medinet and are recent clinical isolates.

D) MIC Data for *H. influenzae* MIC<sub>90</sub> calculations.

**Table 13.** Individual MIC data for *H. influenzae* MIC<sub>90</sub> calculations.<sup>a</sup>

| <i>H. influenzae</i><br>strain | Compound, MIC (µg/mL) |          |            |            |
|--------------------------------|-----------------------|----------|------------|------------|
|                                | <b>2</b>              | <b>5</b> | <b>20f</b> | <b>24I</b> |
| 175                            | 8                     | 0.25     | 0.25       | 0.25       |
| 262                            | 8                     | 0.5      | 1          | 0.5        |
| 275                            | 4                     | 0.5      | 1          | 1          |
| 276                            | 4                     | 0.5      | 0.5        | 0.5        |
| 278                            | 0.5                   | 0.5      | 0.125      | 1          |
| 280                            | 16                    | 1        | 2          | 1          |
| 281                            | 0.25                  | 0.5      | 0.125      | 1          |
| 282                            | 0.5                   | 0.5      | 0.125      | 1          |
| 283                            | 0.5                   | 0.5      | 0.063      | 0.25       |
| 284                            | 32                    | 0.5      | 4          | 2          |
| 286                            | 4                     | 0.5      | 0.5        | 1          |

<sup>a</sup> *H. influenzae* isolates were obtained from Eurofins-Medinet and are recent clinical isolates.

E) MIC Data for *E. coli* MIC<sub>90</sub> calculations.

**Table 14.** Individual MIC data for *E. coli* MIC<sub>90</sub> calculations.<sup>a</sup>

| <i>E. coli</i><br>strain | Compound, MIC (µg/mL) |          |            |            |
|--------------------------|-----------------------|----------|------------|------------|
|                          | <b>2</b>              | <b>5</b> | <b>20f</b> | <b>24I</b> |
| 133                      | >64                   | 0.25     | >32        | 1          |
| 134                      | 1                     | 0.25     | 0.125      | 1          |
| 135                      | >64                   | 0.5      | >32        | 4          |
| 136                      | 2                     | 0.25     | 0.25       | 2          |
| 137                      | >64                   | 0.25     | >32        | 2          |
| 138                      | 2                     | 0.5      | 0.25       | 4          |
| 139                      | >64                   | 0.5      | 32         | 4          |
| 140                      | 0.5                   | 0.125    | 0.063      | 0.5        |
| 141                      | 4                     | 2        | 1          | 8          |
| 142                      | 1                     | 0.25     | 0.063      | 0.5        |
| 143                      | 0.5                   | 0.5      | 0.5        | 0.5        |
| 144                      | 1                     | 0.25     | 0.25       | 1          |
| 145                      | 0.25                  | 0.25     | 0.031      | 0.5        |
| 146                      | 0.5                   | 0.125    | ≤0.016     | 0.5        |
| 147                      | 2                     | 0.25     | 0.125      | 1          |
| 148                      | >64                   | 0.5      | 32         | 2          |
| 149                      | >64                   | 0.5      | 32         | 2          |
| 150                      | 1                     | 0.25     | 0.25       | 2          |
| 151                      | 2                     | 0.25     | 0.125      | 1          |
| 152                      | 1                     | 0.125    | 0.125      | 0.5        |

<sup>a</sup> *E. coli* isolates were obtained from Eurofins-Medinet and are recent clinical isolates.
